# Supplementary material for: The Generation of the Oxidant Agent of a Mononuclear Nonheme Fe(II) Biomimetic Complex by Oxidative Decarboxylation. A DFT Investigation
Source: MDPI journal article supplement (doi:10.3390/molecules25020328), 2020-01-14
Supplement: s1 [file s1]

## Supplementary Information

### The generation of the oxidant agent of a mononuclear nonheme Fe(II) biomimetic complex by oxidative decarboxylation. A DFT investigation

Angela Parise, Maria Costanza Muraca, Nino Russo, Marirosa Toscano and Tiziana Marino,

*Dipartimento di Chimica e Tecnologie Chimiche, Università della Calabria, Cubo I4C, Via P. Bucci, 87036 Arcavacata di Rende, CS, Italy;*

Table S1. Calculated spin contamination for all investigated complexes under all three spin states co spin states examined.

|             | <b>3</b> | <b>5</b> | <b>7</b> |
|-------------|----------|----------|----------|
| <b>a</b>    | 2.0442   | 6.0127   | 12.0233  |
| adduct      | 3.5769   | 6.6643   | 12.0201  |
| TS1         | 2.0210   | 6.6945   | 12.0188  |
| hydroperoxo | 2.0294   | 6.1325   | 12.0182  |
| TS2         | 2.0361   | 6.1380   | -        |
| Prod        | 2.0334   | 6.0156   | 12.0297  |

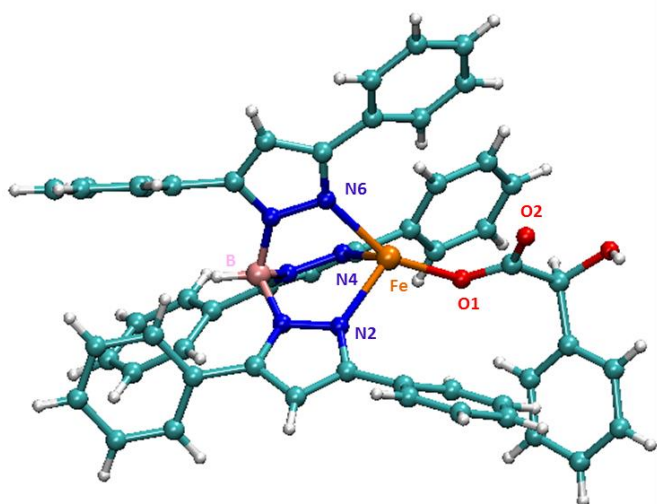

**X-Ray**

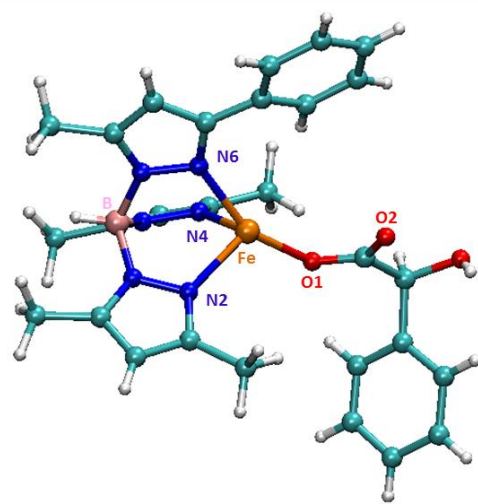

**Model  
(a)**

Figure S1 Crystal structure of hydrotris(3,5-diphenylpyrazole-1-yl)borate) Fe(II)-mandelate and its computational model (a) used in this study.

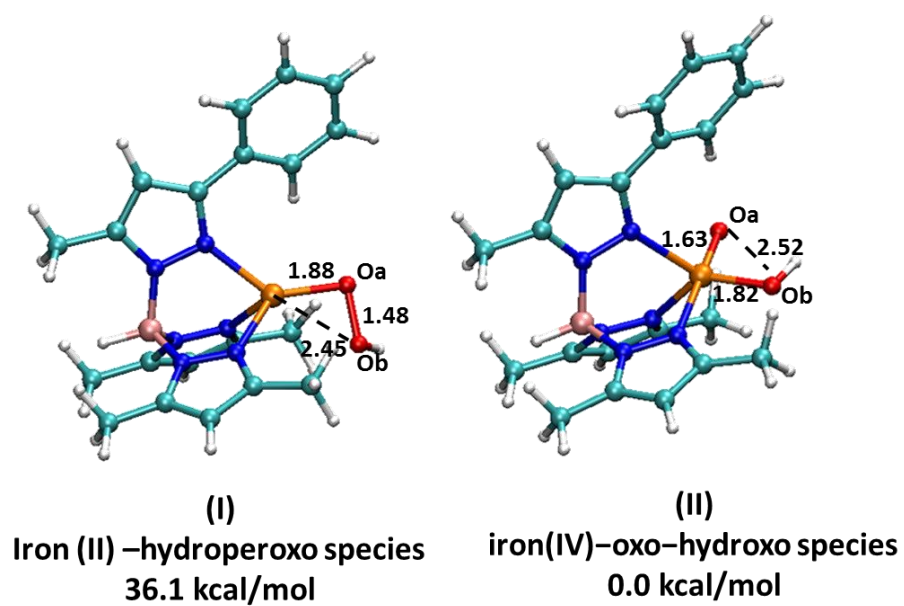

Figure S2 The two possible forms of the product of the oxidative decarboxylation process in quintet species.
